# Supplementary material
Source: PubMed Central journal article supplement (PMC6329762)
Supplement: 41418_2018_114_MOESM1_ESM.pdf [file 41418_2018_114_MOESM1_ESM.pdf]

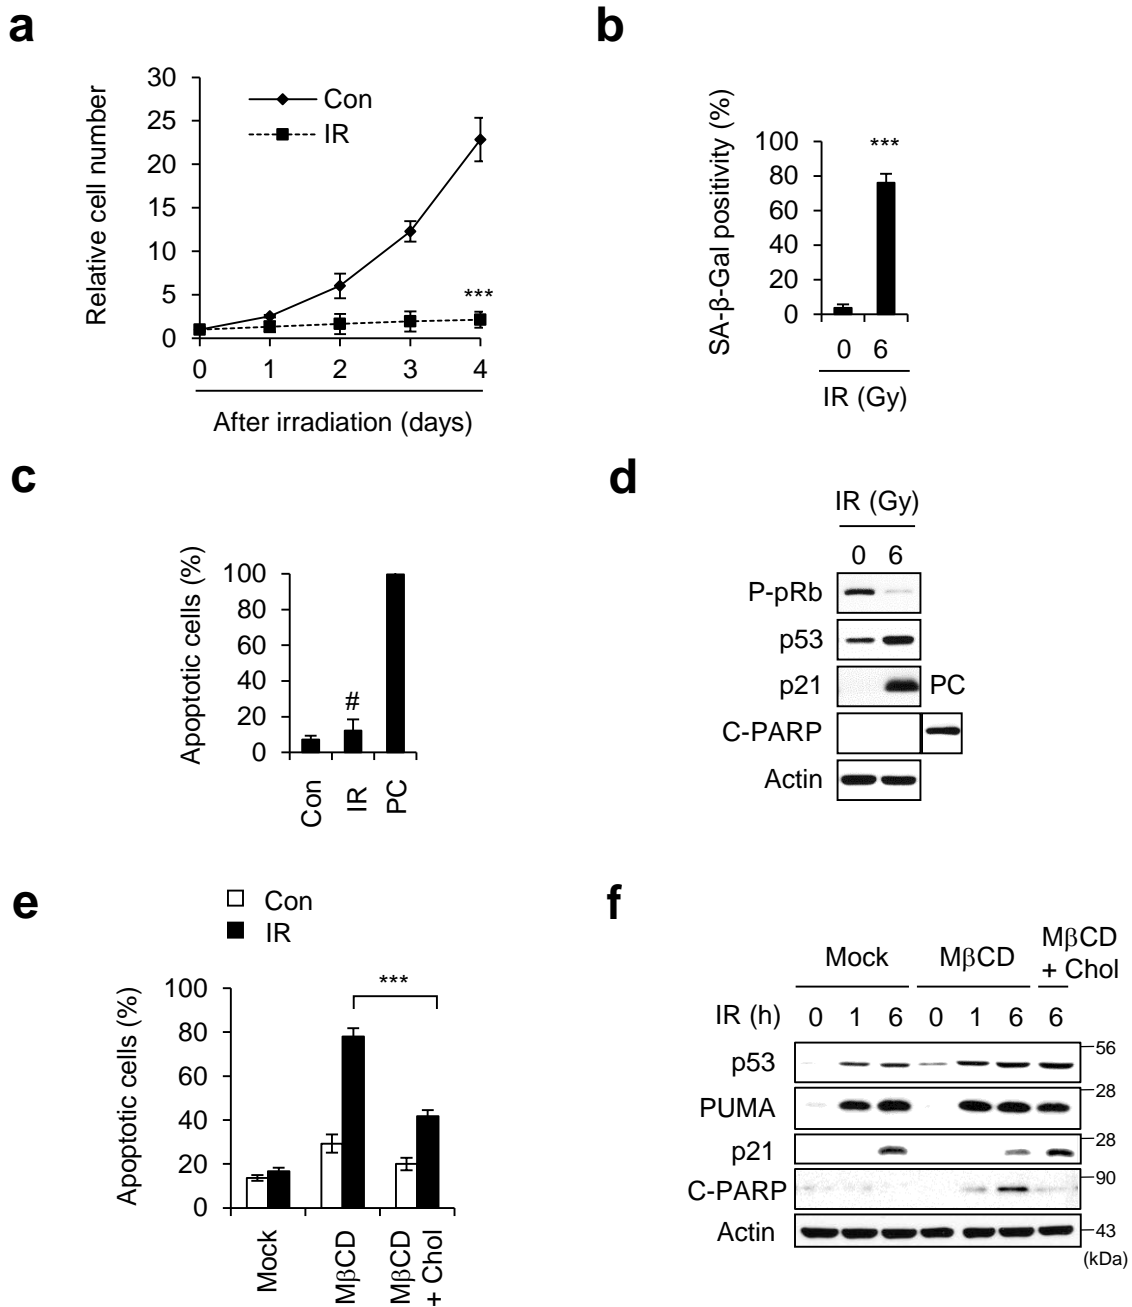

**Supplementary Figure S1.** MCF7 cells were irradiated with IR 6 Gy. **a**, Relative cell numbers were determined on the indicated days. Viable cell numbers on 0 day after irradiation was considered as 1. **b-d**, SA-β-Gal staining (**b**), Annexin V positivity (**c**), and immunoblotting (**d**) were performed at 4 days, 1 day, and 2 days after IR exposure, respectively. **e** and **f**, MCF7 cells were treated without (Mock) or with 0.1 mM MβCD. MβCD+chol indicates cholesterol repletion with the MβCD/cholesterol mixture. Quantification of Annexin V positivity (**e**) and immunoblotting (**f**) were performed at 1 day and 2 days, respectively. The values represent the mean ± SD of three independent experiments. \*\*\*, \*\* and # indicates the statistical significance of  $p < 0.001$ ,  $p < 0.01$ , and  $p > 0.05$  by t-test, respectively.

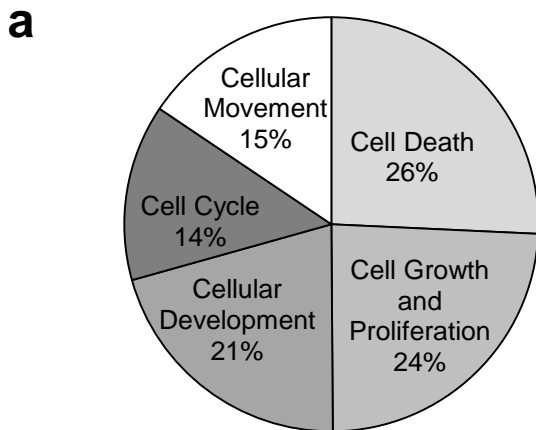

**b**

| Identified Proteins<br>in the integrin-related signaling pathway |
|------------------------------------------------------------------|
| Integrin $\beta$ 4 (Tyr1510)                                     |
| Src (Ser75)                                                      |
| AKT1 (Ser246)                                                    |
| PAK1/2/3 (Ser141)                                                |
| FAK (Tyr407)                                                     |
| AKT2 (Ser473)                                                    |

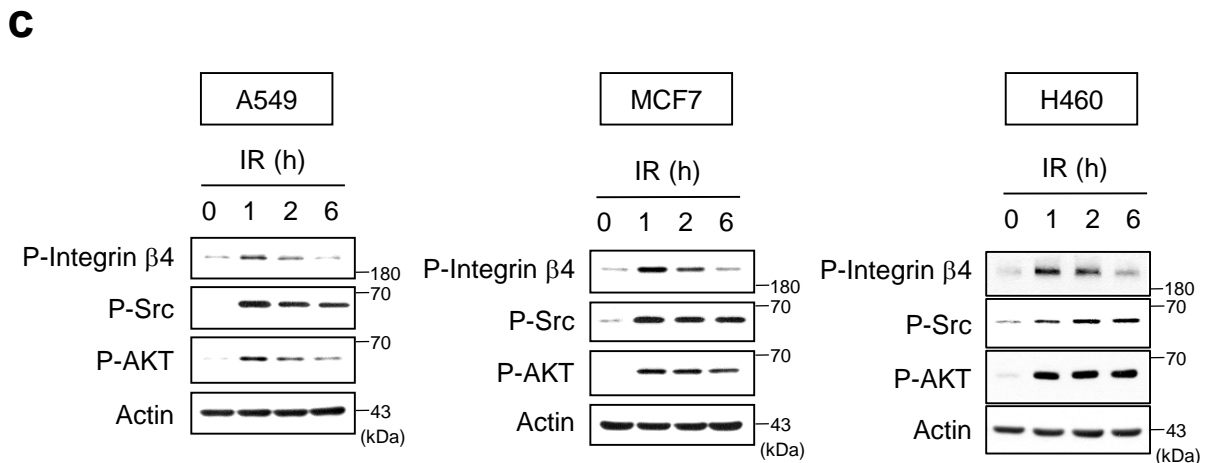

**Supplementary Figure S2.** Functional annotations and putative signaling pathways of IR-induced cellular senescence. **a**, Molecular functions of identified phosphoproteins by the Ingenuity Pathway Analysis (IPA) tool. **b**, The phospho-antibody microarray identified a list of integrin-related signaling molecules whose phosphorylation states increased in 6 Gy of IR exposed MCF7 cells. **c**, A549 (left panel), MCF7 (middle panel), H460 (right panel) cells were irradiated with 6 Gy of IR, and then incubated for the indicated hours. Immunoblot were performed with indicated antibodies. **d**, A549 cells were exposed to 6 Gy of IR and lipid rafts were fractionated 2 hrs. Equal volume for each fraction were resolved by SDS-PAGE and immunoblotting was performed with the indicated antibodies.

**a**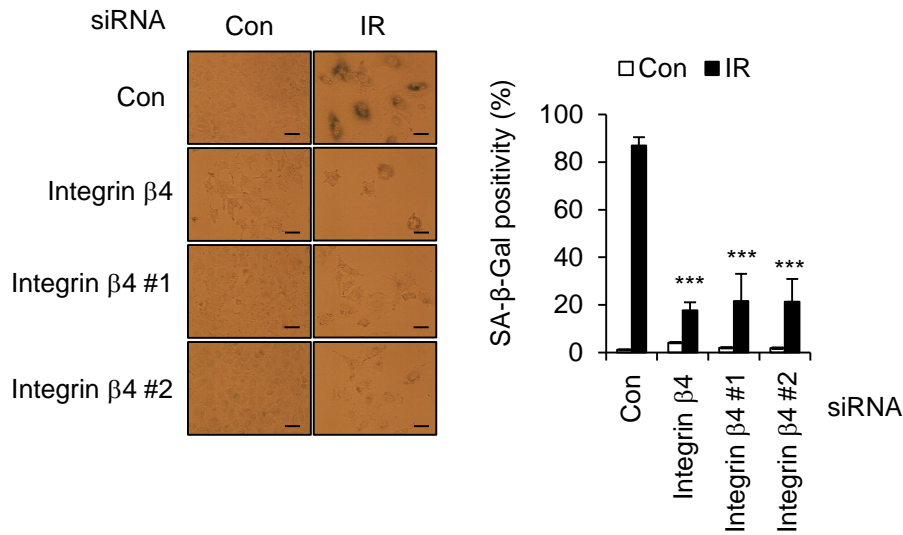**b**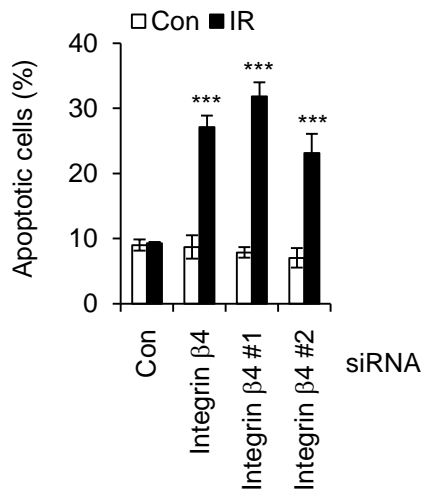**c**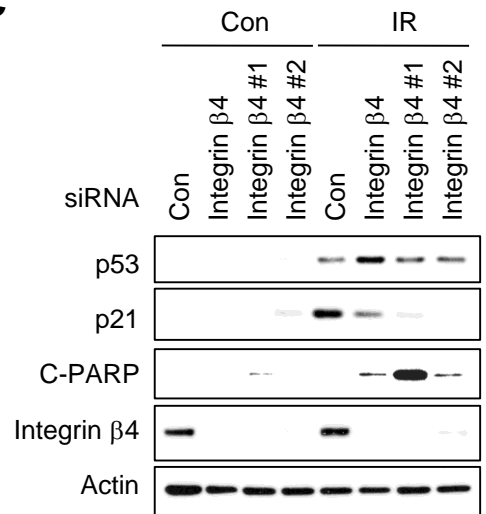

**Supplementary Figure S3.** A549 cells were transfected with two more additional integrin β4 siRNAs and then irradiated with 6 Gy of IR. **a–b**, Assays of SA-β-Gal (**a**) and Annexin V (**b**) were assessed in each group on days 4 and 1 after irradiation, respectively. **c**, Immunoblotting was performed with the indicated antibodies after irradiation. Actin served as the loading control. The values represent the means  $\pm$  SD; \*\*\* indicates  $p < 0.001$  as assessed by t-test.

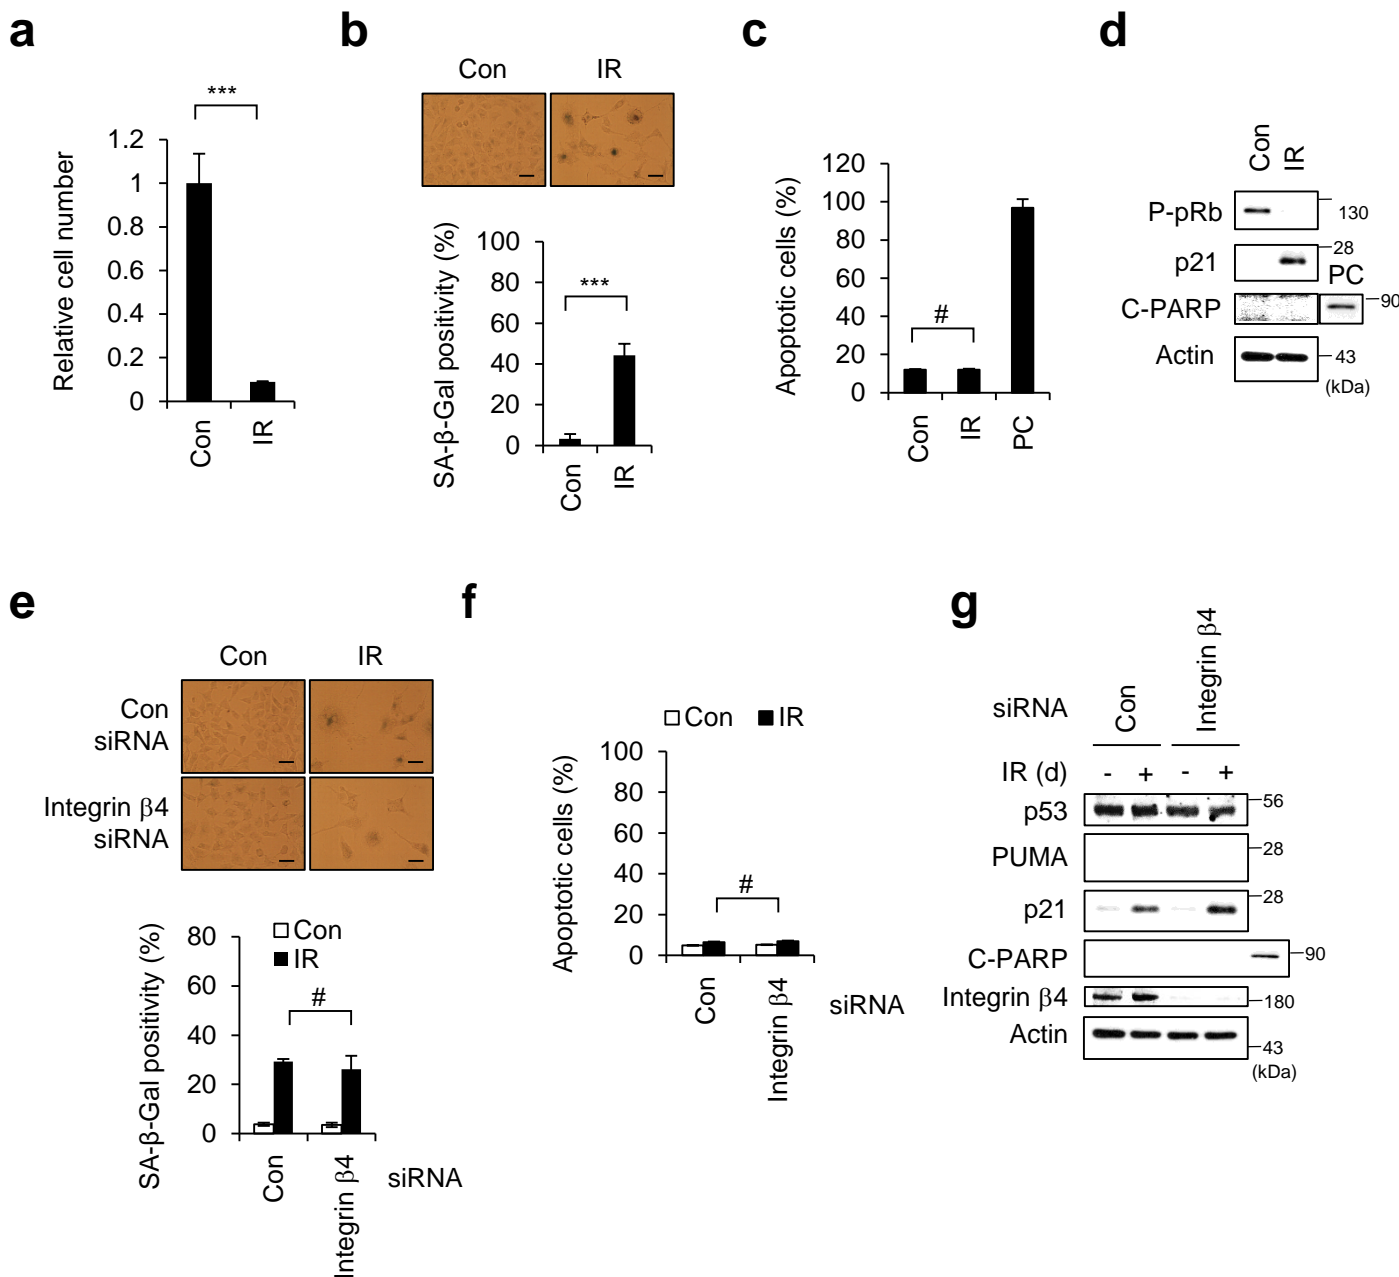

**Supplementary Figure S4.** Human breast adenocarcinoma MDA-MB231 cells having mutant *p53* R280K were irradiated with 6 Gy of IR. **a**, Relative cell numbers were determined 4 days after irradiation. **b–d**, Cells were subjected to SA-β-Gal staining (**b**), Annexin V staining (**c**), and immunoblotting (**d**) on days 4, 1, and 2, respectively. **e–g**, MDA-MB231 cells were transfected with integrin β4 Si and then exposed to 6 Gy IR. SA-β-Gal positivity (**e**), Annexin V positivity (**f**), and immunoblotting (**g**) were conducted on days 4, 1, and 2 after irradiation, respectively. Immunoblotting was performed with the indicated antibodies, and actin served as the loading control. The values represent the means ± SD; \*\*\* and # indicate  $p < 0.001$  and  $p > 0.05$ , respectively, as assessed by t-test.

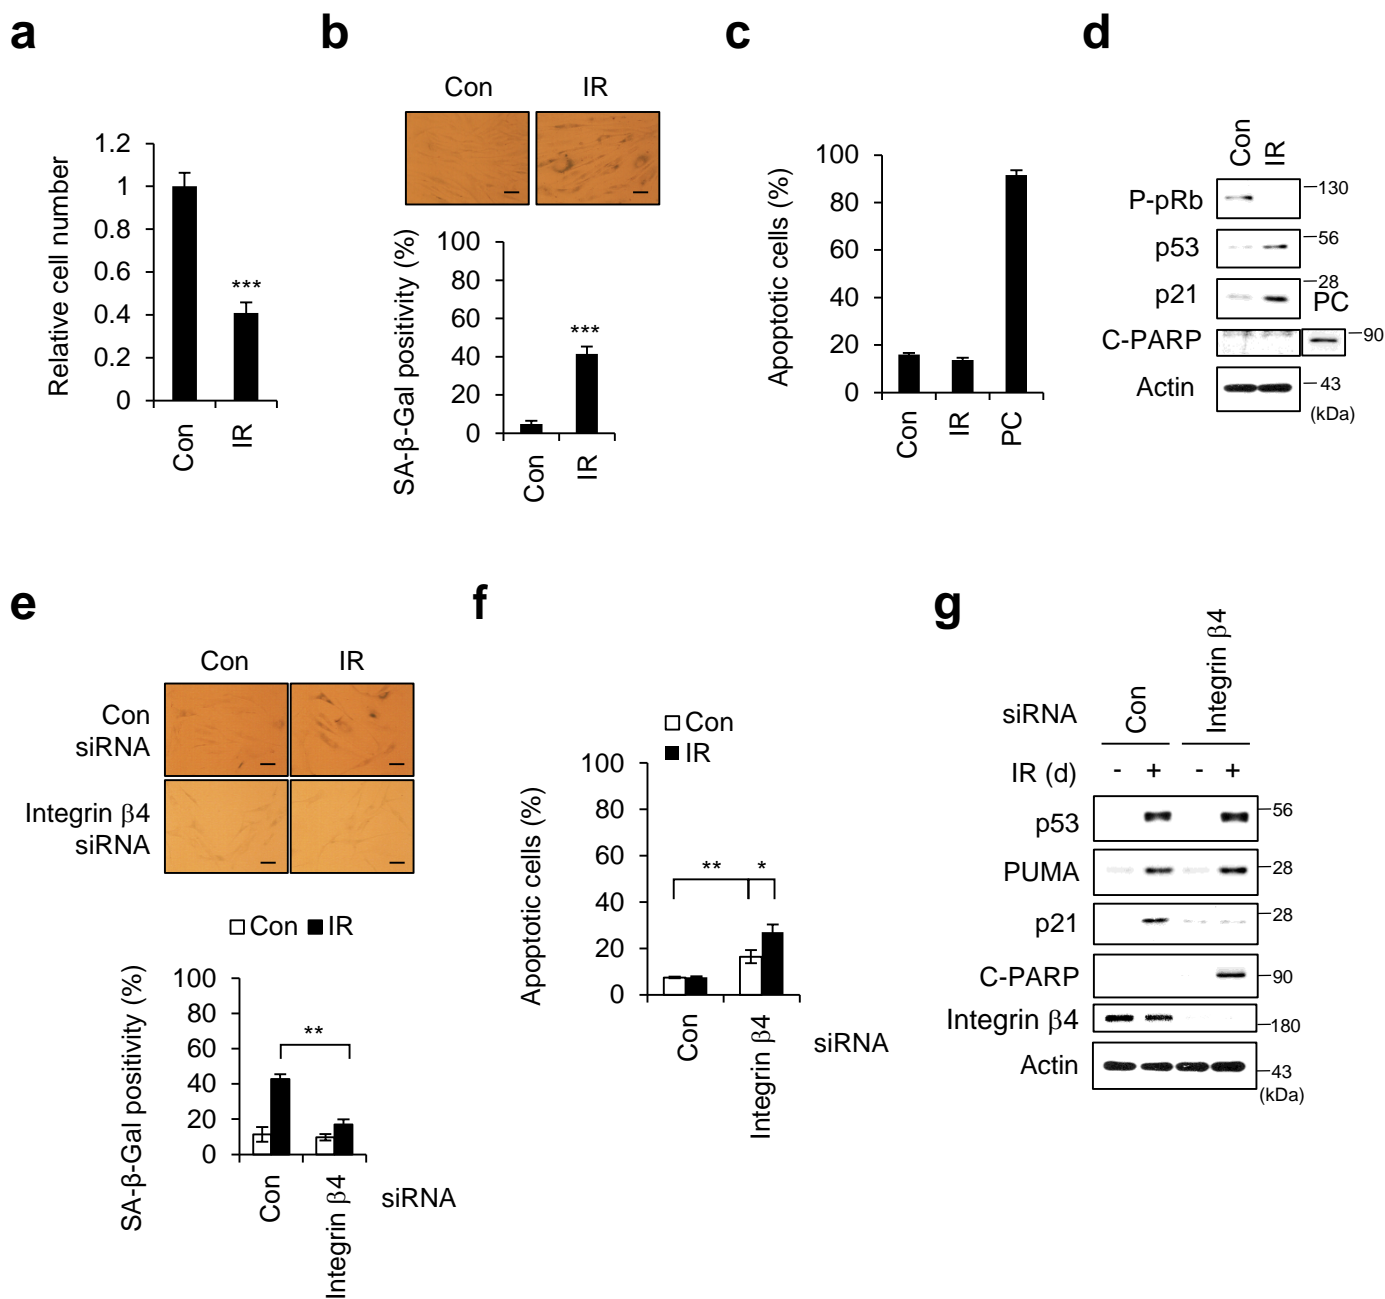

**Supplementary Figure S5.** Non-transformed human diploid fibroblast (HDF) cells were irradiated with 6 Gy of IR. Relative cell numbers were determined 4 days after irradiation. **b–d**, Cells were subjected to SA-β-Gal staining (**b**), Annexin V staining (**c**), and immunoblotting (**d**) on days 4, 1, and 2, respectively. **e–g**, HDF cells were transfected with integrin β4 Si and then exposed to 6 Gy IR. SA-β-Gal positivity (**e**), Annexin V positivity (**f**), and immunoblotting (**g**) were conducted on days 4, 1, and 2 after irradiation, respectively. Immunoblotting was performed with the indicated antibodies and actin served as the loading control. The values represent the means  $\pm$  SD; \*\*\*, \*\*, and \* indicate  $p < 0.001$ ,  $p < 0.01$ , and  $p < 0.05$ , respectively, as assessed by t-test.

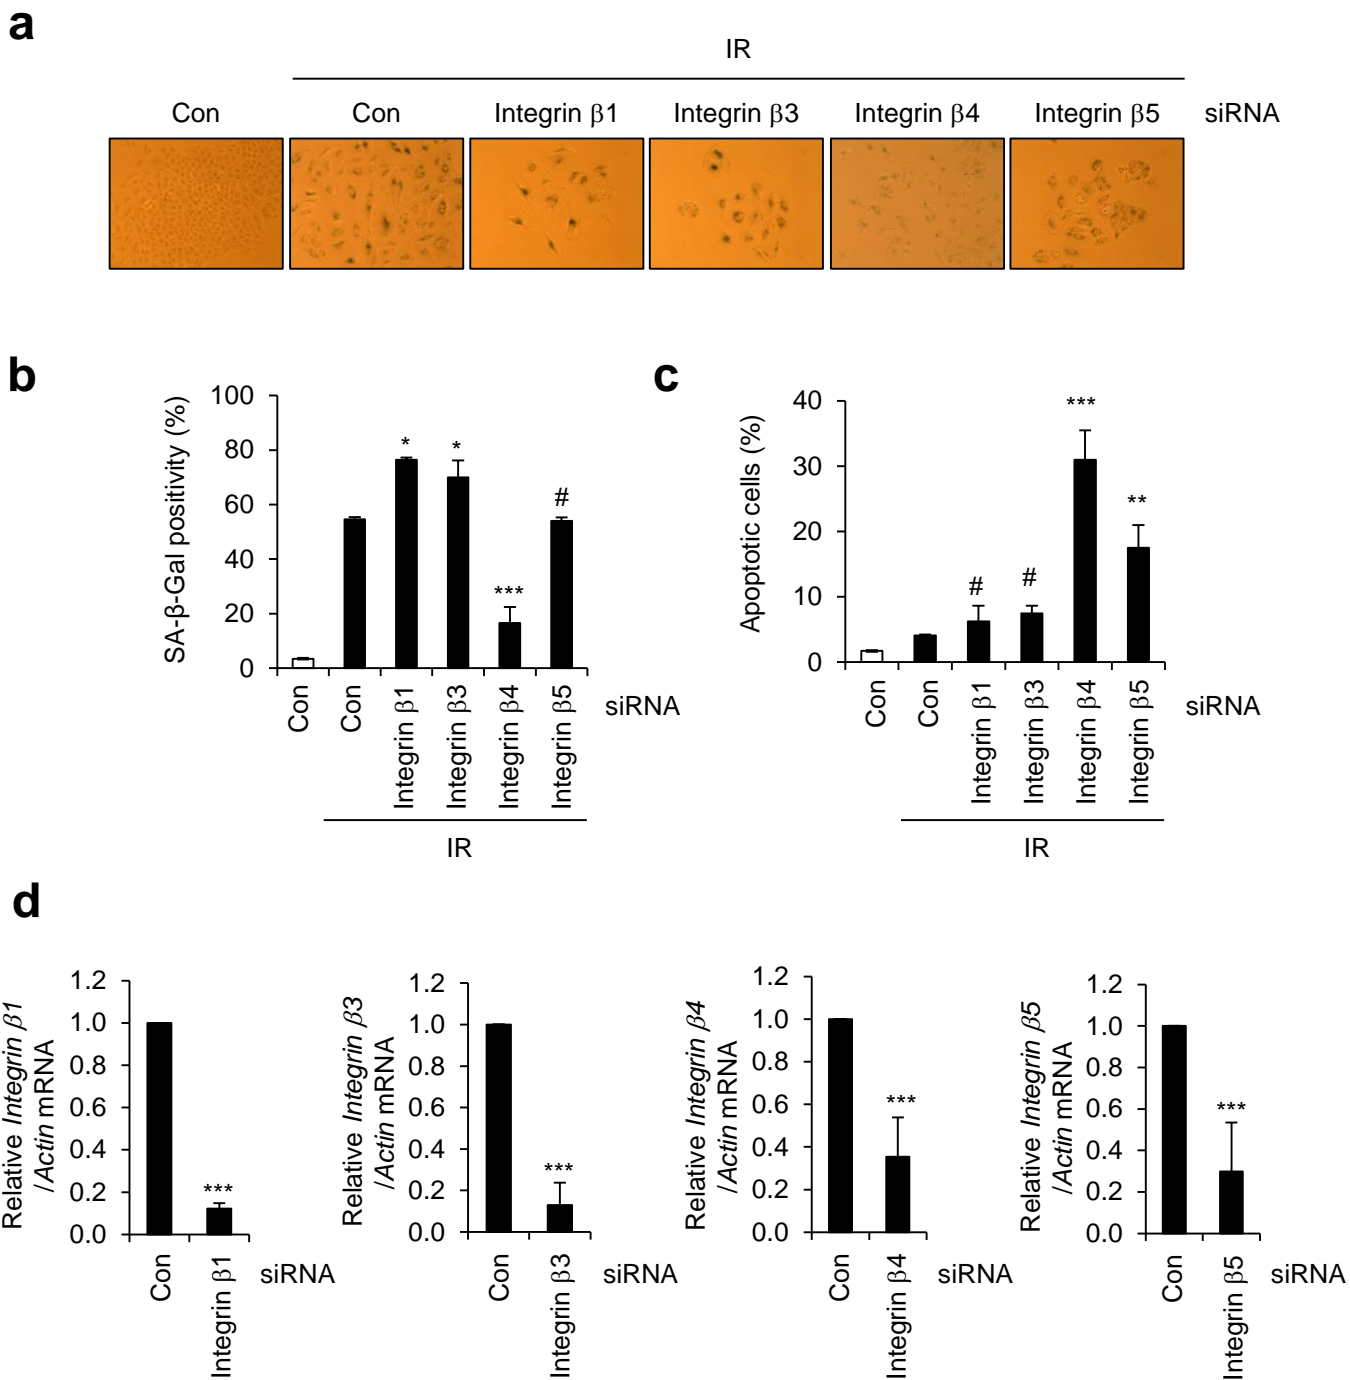

**Supplementary Figure S6.** A549 cells were transfected with the indicated siRNA prior to 6 Gy of IR exposure. **a** and **b**, SA- $\beta$ -Gal staining and its quantification were performed 4 days after irradiation. **c**, Annexin V positive cells were determined 1 day after irradiation. **d**, A549 cells were transfected with the indicated siRNA prior to exposed IR at 6 Gy. qRT-PCR analyses were performed to detect mRNA levels of integrin  $\beta$ 1 Si, integrin  $\beta$ 3 Si, integrin  $\beta$ 4 Si, and integrin  $\beta$ 5 Si after each siRNA transfection. The values represent the mean  $\pm$  SD of three independent experiments. \*\*\*, \*\*, \* and # indicate the statistical significance of  $p < 0.001$ ,  $p < 0.01$ ,  $p < 0.05$ , and  $p > 0.05$  by t-test, comparing to cells irradiated Con Si transfected cells..

**a**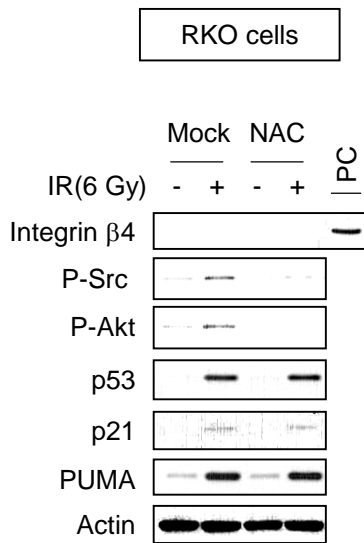**b**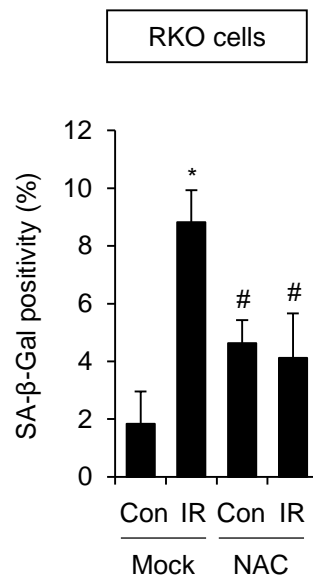

**Supplementary Figure S7.** RKO cells were pretreated with NAC, a ROS scavenger, and then irradiated with 6 Gy of IR. **a–b**, Immunoblot assay (**a**) and quantification of SA- $\beta$ -Gal staining (**b**) were performed 6 h and 4 days after irradiation, respectively. PC indicates positive control. The values represent the means  $\pm$  SD; \* and # indicate  $p < 0.05$  and  $p > 0.05$ , respectively, as assessed by t-test.
